# Supplementary material for: Identifying Risk Factors for Low Piglet Birth Weight, High Within-Litter Variation and Occurrence of Intrauterine Growth-Restricted Piglets in Hyperprolific Sows
Source: MDPI journal article supplement (doi:10.3390/ani11092731), 2021-09-18
Supplement: s1 [file s1]

## Article

# Identifying Risk Factors for Low Piglet Birth Weight, High Within-Litter Variation and Occurrence of Intrauterine Growth-Restricted Piglets in Hyperprolific Sows

Kristina V. Riddersholm <sup>1,†</sup>, Ida Bahnsen <sup>1,†</sup>, Thomas S. Bruun <sup>2</sup>, Leonardo V. de Knecht <sup>1</sup> and Charlotte Amdi <sup>1,\*</sup>

<sup>1</sup> Department of Veterinary and Animal Sciences, Faculty of Health and Medical Sciences, University of Copenhagen, 1870 Frederiksberg, Denmark; riddersholm95@hotmail.com (K.V.R.); idabahnsen@yahoo.dk (I.B.); lvd@sun.ku.dk (L.V.d.K.)

<sup>2</sup> SEGES Danish Pig Research Centre, 1609 Copenhagen, Denmark; thsb@seges.dk

\* Correspondence: ca@sun.ku.dk

† Joint first authors.

**Table S1.** Herd information from production reports (1st of January–1st of September 2019) for the twelve farms included in the study (A–L). Stall describes free-access feeding stalls, Floor describes floor feeding and ESF describes electronic sow feeding.

| Herd                                             | Stall |      |      |                 | Floor |      |      |                 | ESF  |      |      |      |
|--------------------------------------------------|-------|------|------|-----------------|-------|------|------|-----------------|------|------|------|------|
|                                                  | A     | C    | D    | I               | B     | E    | H    | K               | F    | G    | J    | L    |
| Year sows <sup>1</sup>                           | 1900  | 1250 | 1050 | 1150            | 3050  | 2500 | 1250 | 2000            | 800  | 1200 | 1400 | 1700 |
| Liveborn piglets/litter                          | 19.2  | 18.9 | 18.6 | 17.9            | 18.2  | 17.3 | 18.9 | 18.2            | 18.4 | 17.7 | 17.1 | 18.5 |
| Stillborn piglets/litter                         | 2.0   | 1.9  | 2.6  | 2.0             | 1.9   | 1.5  | 2.2  | 1.7             | 1.1  | 1.8  | 2.3  | 1.5  |
| Litters/year sow                                 | 2.23  | 2.36 | 2.37 | 2.36            | 2.36  | 2.29 | 2.34 | 2.34            | 2.34 | 2.23 | 2.24 | 2.36 |
| Weaned piglets/year sow                          | 35.5  | 38.6 | 36.3 | 35.4            | 37.8  | 35.8 | 36.0 | 35.5            | 37.6 | 31.6 | 34.2 | 37.8 |
| Weaned piglets/weaning                           | 12.1  | 13.0 | 13.4 | 12.7            | 15.2  | 12.5 | 11.1 | 11.8            | 13.6 | 11.3 | 11.8 | 13.3 |
| Weaned piglets/litter                            | 15.9  | 16.4 | 15.3 | 15.0            | 16.0  | 15.6 | 15.4 | 15.1            | 16.0 | 14.2 | 15.2 | 16.0 |
| Piglets mortality before weaning (%)             | 17.2  | 13.2 | 18.0 | 14.6            | 11.1  | 10.0 | 18.9 | 16.9            | 12.5 | 19.9 | 11.2 | 12.9 |
| Length of lactation (days)                       | 36    | 30   | 29   | 28              | 24    | 28   | 29   | 30              | 29   | 29   | 31   | 28   |
| Farrowing rate (%)                               | 92.6  | 96.1 | 92.8 | 91.7            | 90.1  | 92.2 | 92.9 | 91.8            | 87.4 | 82.9 | 89.2 | 92.6 |
| Return rate (%)                                  | 1.6   | 1.0  | 4.7  | 2.8             | 3.0   | 3.3  | 1.8  | 2.7             | 3.5  | 6.3  | 4.9  | 2.2  |
| Weaning-to-insemination interval (days)          | 6     | 5    | 5    | 5               | 5     | 6    | 5    | 6               | 8    | 5    | 7    | 6    |
| Home production (HP) or buying (B) young females | B     | B    | B    | HP <sup>2</sup> | B     | B    | B    | HP <sup>3</sup> | B    | B    | B    | B    |

<sup>1</sup> Rounded to closest 50. <sup>2</sup> Zigzag-cross with nucleus management. <sup>3</sup> Own production by bought YY-sows.
